# Supplementary material
Source: Research Square preprint supplement (doi:10.21203/rs.3.rs-9887541/v1)
Supplement: Supplementary file 1 [file 17db9c7195b9636581813106.docx]

**Additional files**

Additional file 1 – CME parents

| Configuration | Mechanism | External contexts (Ce) | Intervention components (Ci) | Effects (E) |
| --- | --- | --- | --- | --- |
| CME1 | Sense of belonging | Ce2.2; Ce2.3; Ce2.4; Ce3.1; Ce3.2; Ce3.3; Ce4.1; Ce4.4; Ce5.1; Ce6.1; Ce7.1 | Ci1.3; Ci2.1; Ci2.2; Ci2.3; Ci2.4; Ci2.5; Ci2.6; Ci2.7; Ci3.1; Ci3.2; Ci3.3; Ci3.4; Ci4.1; Ci4.3; Ci4.5; Ci4.8 | E1.1; E1.2; E1.3; E1.6; E1.7; E1.11; E1.12; E1.16; E1.20. |
| CME2 | Sense of competence | Ce1.1; Ce1.2; Ce1.3; Ce2.1; Ce2.2; Ce2.3; Ce3.3; Ce6.1; Ce6.2; Ce6.3; Ce7.1; Ce7.5 | Ci1.1; Ci1.2; Ci2.1; Ci2.4; Ci2.5; Ci2.6; Ci3.1; Ci3.2; Ci3.3; Ci3.5; Ci3.6; Ci4.1; Ci4.2; Ci4.6; Ci4.7 | E1.6; E1.7; E1.8; E1.11; E1.12; E1.13; E1.14; E1.15; E2.1; E2.2; E2.6 |
| CME3 | Sense of efficacy | Ce1.2; Ce1.3; Ce1.4; Ce2.3; Ce3.3; Ce4.4; Ce7.4; Ce7.5 | Ci1.1; Ci2.1; Ci2.2; Ci2.4; Ci2.5; Ci2.6; Ci3.1; Ci3.2; Ci3.3; Ci4.1; Ci4.2 | E1.2; E1.5; E1.9; E1.11; E1.12; E1.16; E1.17; E1.18; E2.1; E2.2; E2.3; E2.6; E3.3 |
| CME4 | Sense of freedom | Ce2.2; Ce2.3; Ce2.4; Ce3.1; Ce3.2; Ce4.2; Ce4.4; Ce5.1; Ce5.2; Ce6.1; Ce6.3; Ce7.4 | Ci1.1; Ci1.2; Ci2.1; Ci2.2; Ci2.3; Ci2.4; Ci2.7; Ci3.1; Ci3.2; Ci3.3; Ci3.4; Ci3.5; Ci4.3; Ci4.7; Ci4.8 | E1.2; E1.3; E1.5; E1.7; E1.16; E1.17; E1.18; E1.19; E1.20; E2.1; E2.2; E2.3; E2.4; E2.6; E3.3; |
| CME5 | Sense of recognition | Ce2.2; Ce2.3; Ce2.4; Ce3.3; Ce4.1; Ce4.4; Ce6.1; Ce7.3; Ce7.4 | Ci1.3; Ci2.2; Ci2.3; Ci2.4; Ci3.1; Ci3.3; Ci3.5; Ci4.1; Ci4.4; Ci4.6; Ci4.7 | E1.2; E1.3; E1.5; E1.7; E1.14; E1.16; E1.18; E1.19 |
| CME6 | Sense of being supported | Ce2.1; Ce2.2; Ce2.3; Ce2.4; Ce3.1; Ce3.2; Ce3.3; Ce3.5; Ce4.1; Ce4.3; Ce4.4; Ce5.1; Ce5.2; Ce6.1; Ce6.2; Ce6.3; Ce6.4 | Ci1.1; Ci2.1; Ci2.2; Ci2.3; Ci2.4; Ci2.5; Ci2.6; Ci2.7; Ci3.1; Ci3.3; Ci3.4; Ci3.5; Ci4.2; Ci4.3; Ci4.4; Ci4.6; Ci4.7; Ci4.8 | E1.1; E1.2; E1.3; E1.4; E1.5; E1.7; E1.11; E1.12; E1.16; E1.18; E2.1; E2.2; E2.3; E2.5; E3.1; E3.2 |
| CME7 | Sense of transformation | Ce2.1; Ce2.2; Ce2.3; Ce2.5; Ce2.6; Ce3.1; Ce3.2; Ce3.3; Ce3.4; Ce3.5; Ce4.4; Ce5.1; Ce5.2; Ce6.1; Ce6.2; Ce6.3; Ce7.1; Ce7.4; Ce7.5 | Ci1.1; Ci1.3; Ci2.1; Ci2.2; Ci2.3; Ci2.4; Ci2.5; Ci2.6; Ci2.7; Ci3.1; Ci3.2; Ci3.3; Ci3.4; Ci3.5; Ci4.2; Ci4.7; Ci4.8 | E1.2; E1.3; E1.6; E1.7; E1.9; E1.11; E1.12; E1.16; E1.18; E2.1; E2.3; E2.5; E2.6; E3.1; E3.2; E3.3 |

Additional file 2 – CME professionals

| Configuration | Mechanism | External contexts (Ce) | Intervention ingredients (Ci) | Effects (E) |
| --- | --- | --- | --- | --- |
| CME1 | Parental reflective process | Ce2.1; Ce3.1 | Ci1.1; Ci1.4; Ci2.1; Ci2.5; Ci2.6; Ci2.7; Ci3.2; Ci3.3; Ci3.5; Ci3.6; Ci4.4 | E1.1; E1.4; E1.6; E1.7; E2.2; E2.3; E3.4 |
| CME2 | Sense of belonging | Ce2.1 | Ci1.1; Ci1.4; Ci2.1; Ci2.5; Ci2.6; Ci2.7; Ci2.8; Ci3.2; Ci3.5; Ci4.7 | E1.1; E1.2; E3.1; E3.4 |
| CME3 | Sense of parental competence | Ce1.1; Ce4.2 | Ci2.3; Ci3.4; Ci3.6 | E1.1; E1.3; E2.1; E2.2 |
| CME4 | Sense of freedom | Ce1.2; Ce1.3; Ce2.3; Ce4.1 | Ci1.1; Ci2.1; Ci2.5; Ci2.7; Ci3.1; Ci3.2; Ci3.4; Ci3.5; Ci4.2; Ci4.3; Ci4.4; Ci4.5 | E1.2; E1.4; E2.2; E2.4; E3.1 |
| CME5 | Sense of recognition | Ce3.1; Ce4.1; Ce4.3 | Ci2.1; Ci2.2; Ci2.3; Ci2.8; Ci3.1; Ci3.4; Ci3.6; Ci4.4; Ci4.6 | E1.1; E1.3; E1.7; E3.2 |
| CME6 | Sense of security | Ce1.3; Ce1.4; Ce2.1; Ce3.1 | Ci1.1; Ci1.2; Ci1.4; Ci2.1; Ci2.4; Ci3.1; Ci3.2; Ci3.4; Ci3.5; Ci4.1; Ci4.2; Ci4.3; Ci4.4; Ci4.6; Ci4.7 | E1.2; E1.3; E1.4; E1.5; E1.6; E2.3; E2.4; E3.1; E3.2; E3.3 |

Additional file 3 — Parents external contexts (Table S1)

| Ce | Codes |
| --- | --- |
| Ce1 Access to information and readability of resources | Ce1.1 Multiple sources of information (apps, networks, books, media); Ce1.2 Questions about child development; Ce1.3 Inconsistent information; Ce1.4 Lack of visibility or continuity of services (opaque offering, difficult to find) |
| Ce2 Relational environment and social support | Ce2.1 Variable support from co-parent (division of tasks, emotional support); Ce2.2 Judgment from loved ones/unsolicited advice; Ce2.3 Social or emotional isolation; Ce2.4 No support network/weak local social network; Ce2.5 Social pressure on parenting; Ce2.6 Marital difficulties/baby clash |
| Ce3 Life experiences and personal vulnerabilities | Ce3.1 Difficult experiences (miscarriage, bereavement, assisted reproduction, blended families); Ce3.2 Psychological fragility (anxiety, burnout, baby blues, postpartum depression); Ce3.3 Parental transitions (pregnancy, birth, second child, breastfeeding); Ce3.4 Identity crisis or upheaval related to becoming a parent; Ce3.5 Unreassuring experiences with professional support |
| Ce4 Territorial organisation and accessibility of parental resources | Ce4.1 Lack of suitable spaces for parents and babies; Ce4.2 Limited accessibility (transport, location, logistics); Ce4.3 Difficulty in obtaining childcare; Ce4.4 Geographical isolation (moving house, rural areas) |
| Ce5 Public policies, institutional organisation, and structural conditions | Ce5.1 Parenting-work policies (leave, flexibility, maternal mental load); Ce5.2 Lack of postpartum support |
| Ce6 Social norms and cultural frameworks of parenting | Ce6.1 Pressure to be the perfect parent; Ce6.2 Gender norms (maternal mental load, undervalued fatherhood); Ce6.3 Normative/contradictory educational models; Ce6.4 Underrecognized role of the father |
| Ce7 Supportive external environment | Ce7.1 Friends going through the same thing at the same time; Ce7.2 Supportive family; Ce7.3 Work that facilitates work-life balance; Ce7.4 Presence of supportive wellness or mental health professionals; Ce7.5 Supportive co-parent |

Additional file 4 — Parental intervention contexts (Table S2)

| Ci | Codes |
| --- | --- |
| Ci1 Accessibility and entry requirements | Ci1.1 Access modalities and flexibility; Ci1.2 Geographic/financial/scheduling accessibility; Ci1.3 Various entry modalities (in person, video, WhatsApp) |
| Ci2 Format | Ci2.1 Family-friendly; Ci2.2 Friendly, informal atmosphere, not institutionalised; Ci2.3 Discussion groups (with/without professionals, babies of the same age); Ci2.4 Peer support and sharing between peers; Ci2.5 Themed workshops, group activities, resource areas; Ci2.6 Individual support (in person/virtual); Ci2.7 Intimate, relaxed atmosphere |
| Ci3 Attitudes of the host/professional and quality of the relationship | Ci3.1 Active listening, neutrality, non-judgment; Ci3.2 Valuing parents and their resources; Ci3.3 Facilitating and supportive attitude ; Ci3.4 Reassurance; Ci3.5 Parent-professional relationship of trust; Ci3.6 Clear, consistent information |
| Ci4 Vision of the place, territorial anchoring, and collective dynamics | Ci4.1 Systemic vision of the family (including co-parent, siblings); Ci4.2 Multidisciplinary approach; Ci4.3 Local network and continuity of services; Ci4.4 Shared governance, participation, and co-construction with parents; Ci4.5 Building social ties and community dynamics; Ci4.6 Non-medicalised and preventive approach; Ci4.7 Diversified offering; Ci4.8 Continuity and regularity over time |

Additional file 5 — Effects on parents (Table S3)

| Effects | Codes |
| --- | --- |
| E1 Intrapersonal effects | E1.1 Joy; E1.2 Calmness/serenity; E1.3 Emotional decompression; E1.4 Relief from mental burden; E1.5 Stress reduction; E1.6 Reassurance; E1.7 Feeling of inner self-confidence; E1.8 Parental confidence; E1.9 "Allowing oneself to..."; E1.10 Reflective capacity; E1.11 Discernment; E1.12 Ability to put things into perspective; E1.13 Self-observation; E1.14 Change of perspective; E1.15 Confidence in child development; E1.16 Alignment -identity in one's role as parent; E1.17 Redefining priorities; E1.18 Self-care; E1.19 Taking time; E1.20 Getting out of the house/breaking isolation |
| E2 Interpersonal effects | E2.1 Ability to adjust; E2.2 Full presence; E2.3 Creating a safe environment; E2.4 Moments of closeness, rituals; E2.5 Shared pleasure; E2.6 Increased time spent together |
| E3 Extrapersonal effects | E3.1 Social network and community; E3.2 Community involvement; E3.3 Adjustments and harmonisation of parenting practices within the couple |

Additional file 6 — Parenting mechanisms (Table S4)

| MechanismS | Codes |
| --- | --- |
| M1 Sense of belonging | M1.1 Sense of having built one's village; M1.2 Sense of mutual aid; M1.3 Sense of identification |
| M2 Sense of competence | M2.1 Sense of confidence; M2.2 Sense of discernment |
| M3 Sense of efficacy | M3.1 Sense of satisfaction; M3.2 Sense of ownership |
| M4 Sense of freedom | M4.1 Sense of freedom from obligation; M4.2 Sense of being able to be oneself; M4.3 Sense of being able to express oneself freely |
| M5 Sense of recognition | M5.1 Sense of being valued; M5.2 Sense of being recognised in all one's many facets |
| M6 Sense of being supported | M6.1 Feeling of belonging; M6.2 Feeling of being understood; M6.3 Feeling of being surrounded |
| M7 Sense of transformation | M7.1 Feeling of surpassing oneself; M7.2 Feeling of self-discovery |

PROFESSIONALS

Additional file 7— External professional contexts (Ce)

| Ce | Codes |
| --- | --- |
| Ce1 Life course and parenting situation | Ce1.1 Recent parental transitions (pregnancy, birth, arrival of a child); Ce1.2 Parental fatigue, mental overload and lack of respite; Ce1.3 Lack of safe spaces to express one’s experiences and concerns |
| Ce2 Relational and social environment | Year 2.1 Social or emotional isolation |
| Ce3 Access to resources and support | Ce3.1 Questions or uncertainties regarding child development and parenting practices |
| Ce4 Social norms and cultural pressures | Ce4.1 Social expectations of the ‘good parent’; Ce4.2 Pressure to perform in education; Ce4.3 Gendered norms of care and maternal roles |

Additional file 8 – Interventional contexts (Ci) identified in professional interviews

| ci | Codes |
| --- | --- |
| Ci1 Accessibility | Ci1.1 Open access without an appointment; Ci1.2 Variety of access methods (face-to-face, video call, telephone, WhatsApp); Ci1.3 Identification of local venues as resources; Ci1.4 Regularity and continuity of support |
| Ci2 Format | Ci2.1 Group and community-based formats (support groups, drop-in sessions, meetings); Ci2.2 Experiential parent-child formats; Ci2.3 Psycho-educational and prevention formats; Ci2.4 Personalised support; Ci2.5 Friendly and informal atmosphere; Ci2.6 Intimate atmosphere in small groups; Ci2.7 Everyday resource venues (cafés, nurseries, third places); Ci2.8 Peer support dynamics and horizontal exchanges |
| Ci3 Professional attitudes and quality of the relationship | Ci3.1 Active listening, empathy and authenticity; Ci3.2 Unconditional and non-judgemental welcome; Ci3.3 Climate of relational safety; Ci3.4 Recognition and valuing of parenting skills; Ci3.5 Empowering support approach (‘working with’); Ci3.6 Reassurance and alleviating guilt |
| Ci4 Vision of the programme and collective dynamics | Ci4.1 Preventive, holistic and family-centred approach; Ci4.2 Aim of creating social bonds; Ci4.3 Co-construction with parents; Ci4.4 Continuity of the pathway; Ci4.5 Diversity and complementarity of the provision; Ci4.6 Presence of identified support staff; Ci4.7 Local network and coordination of stakeholders |

Additional file 9 – Professional mechanisms

| Mechanism | Description |
| --- | --- |
| M1 Parental reflection process | Process of taking a step back to reflect on parenting practices, perceptions and experiences |
| M2 Sense of belonging | Sense of being part of a community and sharing a common experience with other parents |
| M3 Sense of parental competence | Sense of being able to act, understand one’s child and draw on educational resources |
| M4 Sense of freedom | The opportunity for parents to express themselves freely, to be themselves and not to be reduced to their parental role |
| M5 Sense of recognition | Sense of being recognised and valued in one’s parental role |
| M6 Sense of security | Experience of a climate of trust, welcome and reassurance within the programme |

Additional file 10 – Positive effects

| effects | Codes |
| --- | --- |
| E1 Intrapersonal effects | E1.1 Reassurance; E1.2 Calmness / serenity; E1.3 Letting go; E1.4 Self-care; E1.5 Permission to be oneself; E1.6 Facilitated expression; E1.7 Confidence and assertiveness in one’s decisions |
| E2 Interpersonal effects | E2.1 Better understanding of the child; E2.2 Adjustment and adaptation of parenting practices; E2.3 More nuanced parent-child interactions; E2.4 Quality time with the child |
| E3 Extrapersonal effects | E3.1 Building social connections and mutual support; E3.2 Developing friendships; E3.3 Participation in community life; E3.4 Improved relationship with partner |

Additional file 11. Semi-structured interview guide for parents

This interview guide was developed as part of the APPIE-Village multi-case realist evaluation exploring the conditions that foster parental empowerment within parenting support services.

The interviews aimed to explore parents’ experiences, the mechanisms that may be activated through parenting support services, and the contextual factors that facilitate or constrain parental empowerment. The guide was used flexibly and adapted according to participants’ situations and the dynamics of the discussion.

1. Why did you come to this service for the first time?

(To identify the external context and the initial reason for attending)

1. What were you hoping to find by coming here?

(To explore parents’ expectations and needs)

Possible prompts:
• Were you looking for support?
• Was there anything specific you hoped to gain from attending?

1. Did you find what you were looking for? Why or why not?

(To explore the relationship between initial needs and the intervention components)

Possible prompts:
• What helped you the most?
• Was there anything missing?
• What made you want to come back?

1. How do you feel when you are here?

(To explore internal mechanisms and experiences associated with the service)

1. What does this service bring to your life as a parent?

(To explore perceived benefits and processes related to parental empowerment)

1. What changes have you noticed since attending this service?
2. In your opinion, what would an ideal “village” around parents look like?

Additional file 12. Semi-structured interview guide for professionals

This interview guide was developed as part of the APPIE-Village multi-case realist evaluation exploring the conditions that foster parental empowerment within parenting support services.

The interviews aimed to explore professionals’ perceptions of parents’ needs, the mechanisms activated within parenting support services, and the effects observed in parents’ experiences. The guide was used flexibly and adapted according to the interview context and the dynamics of the discussion.

1. In your opinion, why do parents come to this service?

(To identify parents’ initial needs and the contexts that lead them to attend the service)

1. In your opinion, what are parents looking for when they come to this service?

(To explore parents’ expectations and feelings)

1. Have you observed any changes in parents since they started attending the service?

(To explore the perceived effects of the service)

1. In your opinion, what aspects of the support provided contribute to these changes?

(To explore the intervention components of the service)

1. Based on your experience, what would an ideal “village” around parents look like?

(To explore professionals’ representations of environments that foster parental empowerment)
